# Supplementary material for: Genomic variants within chromosome 14q32.32 regulate bone mass through MARK3 signaling in osteoblasts
Source: JCI journal article supplement (doi:10.1172/jci142580), 2021-03-31
Supplement: sd1 [file 1]

## Supplemental Material

### Supplemental Methods

**Genotyping of *Mark3* global KO and *Mark3<sup>ff</sup>* mice.** *Mark3* global KO genotypes were determined based on the presence or absence of the KO allele and the WT allele using two separate genotyping reactions. The genotyping primers used to determine the presence of the KO allele were: F – GCTTCCTGTGCACTGGGGTTA, R – CCTTCATTCTTCCATGTGCAACC. The genotyping primers used to determine the presence of the WT allele were: F – GCTTCCTGTGCACTGGGGTTA, R – TGAGCCAATTCTCCAGCTCT. The genotyping primer set used for *Mark3<sup>ff</sup>* mice were: F – GCTTCCTGTGCACTGGGGTTA, R – TGAGCCAATTCTCCAGCTCT, with a PCR product of 220 bp WT and 438 bp transgene.

**Supplemental Figure 1. Expression of MARK3 protein in *Mark3<sup>-/-</sup>* mice, *Mark3<sup>ff</sup>;Oc-Cre* mice and their control littermates.** (A) Immunoblot of MARK3 in femoral cortical bone, bone marrow, white adipose tissue (WAT), hippocampus and kidney of *Mark3<sup>+/+</sup>* and *Mark3<sup>-/-</sup>* mice. (B) Immunoblot of MARK3 in femoral cortical bone, bone marrow, WAT, hippocampus and kidney in *Mark3<sup>ff</sup>* and *Mark3<sup>ff</sup>;Oc-Cre* mice. Graphs represent mean  $\pm$  SEM, and \* $p < 0.05$  by Student's t-test between groups.

**Supplemental Figure 2. Immunoblot of  $\beta$ -catenin in *Mark3* deleted primary osteoblasts.** *Mark3<sup>ff</sup>* primary osteoblasts were transfected with Ad-GFP and Ad-CRE. 48h later, p- $\beta$ -catenin and t- $\beta$ -catenin was measured (n=6). p- $\beta$ -catenin was normalized by t- $\beta$ -catenin. Graphs represent mean  $\pm$  SEM, and \* $p < 0.05$  by Student's t-test between groups.

**Supplemental Figure 3. Schematic of R26-LSL-JAG1 overexpression mouse model.** Schematic of R26-LSL-JAG1 vector is showing before and after Cre-mediated excision. The floxed mice have loxP-flanked STOP cassette (Neo with 3x polyA) upstream of the *Jag1* locus.

**Supplemental Table 2. Gene symbols, fold changes in expression, and adjusted p-values of Notch pathway in pathway analyses of RNA-seq.**

| <b>Gene</b> | <b>fold change</b> | <b>p-value</b> |
|-------------|--------------------|----------------|
| Kat2a       | 0.559561           | 0.00283        |
| Dvl2        | 0.394093           | 0.000846       |
| Dvl3        | 0.377788           | 0.000589       |
| Ctbp1       | 0.40716            | 0.003426       |
| Dtx2        | 0.369867           | 0.000791       |
| Dtx3        | 0.526604           | 0.014069       |
| Rfng        | 0.39808            | 0.000559       |
| Dvl1        | 0.154124           | 2.21E-07       |
| Numbl       | 0.239531           | 0.000873       |
| Notch3      | 0.389655           | 0.00173        |
| Notch2      | 0.716462           | 0.017649       |
| Notch1      | 0.377058           | 0.0009         |
| Psen2       | 0.428345           | 0.005485       |
| Lfng        | 0.288177           | 0.000732       |
| Ncor2       | 0.202379           | 9.09E-05       |

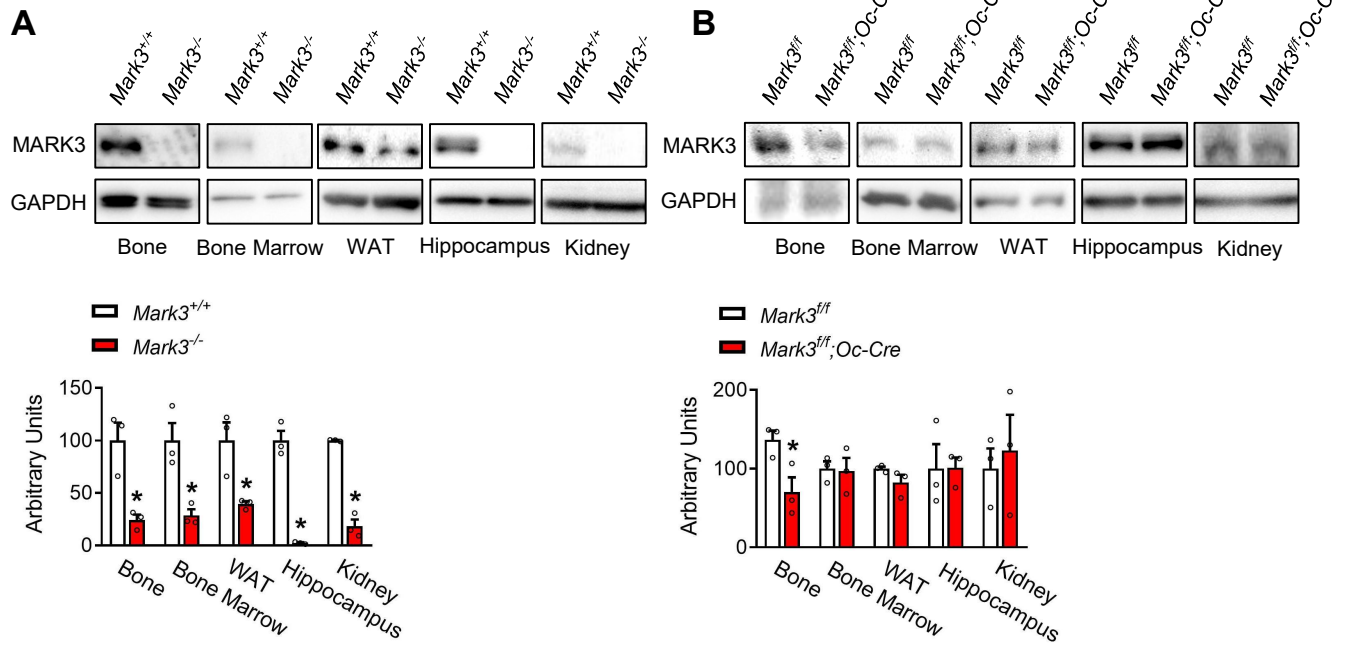

Figure S1

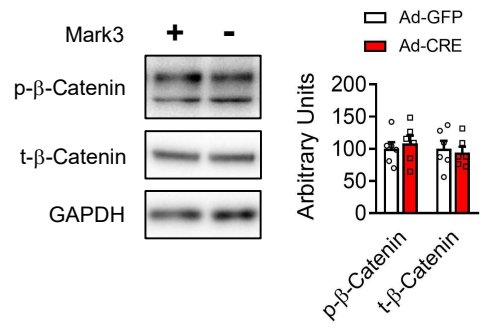

**Figure S2**

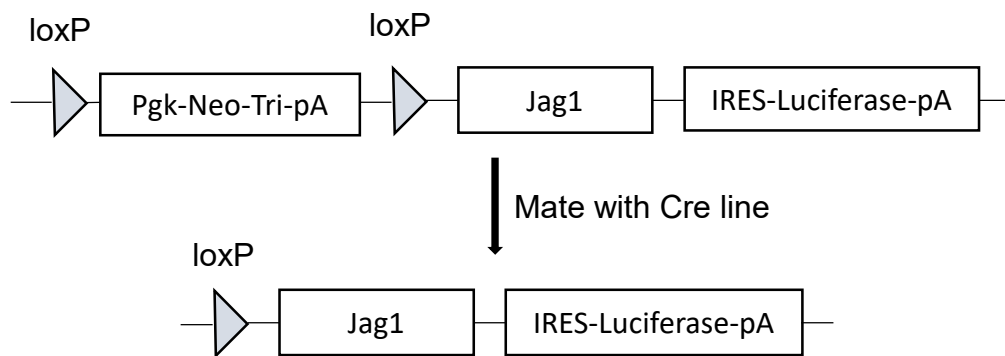

**Figure S3**
